# Supplementary material
Source: Springer Nature journal article supplement (https://www.springermedizin.de/resource/supplementary/12889_2010_2987_MOESM2_ESM.pdf/9487832)
Supplement: MOESM2 [file 9487832]

Identification

**Problem misidentification**

Criminalisation

Compensating (displaced) behaviour

Compulsion

**Lack of public support**

**Lobby group opposition**

Obfuscating the new regulations

Enforcement

**Low perceived threat of enforcement/punishment**

**Insufficient enforcement resources**
